# Supplementary material
Source: publisher site journal article supplement (https://www.spandidos-publications.com/8575/downloadSupplementary)
Supplement: Supplementary file 1 [file downloadSupplementary]

## Sheet: Figure 1
Table SI. Statistical methods, results and sample size related to Figure 1
Figure	Target	Group	Mean	Shapiro-Wilk test		Brown-Forsythe text		Post hoc pairwise comparisons				Sample size
				W	P	F, DFn, Dfd	p value	Comparisons	Cohen’s d	Power	p value
1C	LVEF	Sham	82.83	0.9469	0.7147	2.294, 3, 16	0.1169	Sham vs. HFpEF	0.45	0.0965	0.8958	n = 5
		Sham+Dapagliflozin	84.16	0.889	0.3522			HFpEF vs. HFpEF+Dapagliflozin	0.96	0.2679	0.2922
		HFpEF	83.75	0.9948	0.9935
		HFpEF+Dapagliflozin	86.18	0.9817	0.9436
1D	GSL	Sham	-9.4	0.9609	0.814	26.43, 3, 16	<0.0001	Sham vs. HFpEF	4.85	0.9999	<0.0001	n = 5
		Sham+Dapagliflozin	-9.6	0.9609	0.814			HFpEF vs. HFpEF+Dapagliflozin	2.83	0.9734	0.0198
		HFpEF	-14	0.8835	0.3254
		HFpEF+Dapagliflozin	-12	0.8835	0.3254
1E	E/E'	Sham	22.4	0.9524	0.754	75.11, 3, 16	<0.0001	Sham vs. HFpEF	7.33	0.9999	<0.0001	n = 5
		Sham+Dapagliflozin	22.6	0.9609	0.814			HFpEF vs. HFpEF+Dapagliflozin	4.4	0.9999	<0.0001
		HFpEF	37.6	0.9524	0.754
		HFpEF+Dapagliflozin	28.8	0.9787	0.9276
1F	HW/TL	Sham	8.452	0.8682	0.2591	65.31, 3, 16	<0.0001	Sham vs. HFpEF	6.98	0.9999	<0.0001	n = 5
		Sham+Dapagliflozin	8.312	0.8503	0.1954			HFpEF vs. HFpEF+Dapagliflozin	3.17	0.9916	<0.0001
		HFpEF	10.03	0.9081	0.4562
		HFpEF+Dapagliflozin	9.091	0.8545	0.2093
1G	Running distance	Sham	289.2	0.9844	0.9565	37.16, 3, 16	<0.0001	Sham vs. HFpEF	4.86	0.9999	<0.0001	n = 5
		Sham+Dapagliflozin	291	0.97	0.8756			HFpEF vs. HFpEF+Dapagliflozin	3.96	0.9997	0.0002
		HFpEF	261.6	0.9642	0.8371
		HFpEF+Dapagliflozin	279.2	0.9738	0.8989
1I	Pre-modeling SBP	Sham	96.6	0.9506	0.7417	0.6532, 3, 16	0.5925	Sham vs. HFpEF	0.18	0.0573	0.9917	n = 5
		Sham+Dapagliflozin	98.6	0.9506	0.7417			HFpEF vs. HFpEF+Dapagliflozin	0.54	0.1175	0.7798
		HFpEF	97.2	0.9564	0.7828
		HFpEF+Dapagliflozin	99.2	0.943	0.6871
	Pre-modeling DBP	Sham	67.8	0.9787	0.9276	0.6721, 3, 16	0.5815	Sham vs. HFpEF	0.55	0.1201	0.8088	n = 5
		Sham+Dapagliflozin	67.6	0.9609	0.814			HFpEF vs. HFpEF+Dapagliflozin	0.7	0.1648	0.5156
		HFpEF	66.4	0.9229	0.5487
		HFpEF+Dapagliflozin	68.6	0.958	0.7941
	Post-modeling SBP	Sham	100.4	0.9787	0.9276	51.08, 3, 16	<0.0001	Sham vs. HFpEF	5.61	0.9999	<0.0001	n = 5
		Sham+Dapagliflozin	98	0.9366	0.6421			HFpEF vs. HFpEF+Dapagliflozin	2.94	0.9813	0.0004
		HFpEF	129.8	0.9819	0.9443
		HFpEF+Dapagliflozin	114.4	0.9787	0.9276
	Post-modeling DBP	Sham	70.2	0.9622	0.8234	32.06, 3, 16	<0.0001	Sham vs. HFpEF	6.06	0.9999	<0.0001	n = 5
		Sham+Dapagliflozin	71.8	0.879	0.305			HFpEF vs. HFpEF+Dapagliflozin	3.43	0.9969	0.0011
		HFpEF	87.6	0.9506	0.7417
		HFpEF+Dapagliflozin	78.2	0.9155	0.5012

## Sheet: Figure 9
Table SII. Statistical methods, results and sample size related to Figure 9
Figure	Target	Group	Mean	Shapiro-Wilk test		Brown-Forsythe text		Post hoc pairwise comparisons				Sample size
				W	P	F, DFn, Dfd	p value	Comparisons	Cohen’s d	Power	p value
9B	LVEF	HFpEF	83.5	0.9897	0.9786	0.2917, 3, 16	0.8308	HFpEF vs. HFpEF+Dapagliflozin	0.1	0.0523	0.9995	n = 5
		HFpEF+Dapagliflozin	83.31	0.959	0.8008			HFpEF+Dapagliflozinn+oe-NC vs. HFpEF+Dapagliflozinn+oe-AIM2	0.16	0.0558	0.9886
		HFpEF+Dapagliflozinn+oe-NC	84.71	0.9539	0.7652
		HFpEF+Dapagliflozinn+oe-AIM2	84.18	0.9538	0.7642
9C	GSL	HFpEF	-14.2	0.881	0.314	51.95, 3, 16	<0.0001	HFpEF vs. HFpEF+Dapagliflozin	7.17	0.9999	<0.0001	n = 5
		HFpEF+Dapagliflozin	-8.2	0.881	0.314			HFpEF+Dapagliflozinn+oe-NC vs. HFpEF+Dapagliflozinn+oe-AIM2	4.29	0.9999	<0.0001
		HFpEF+Dapagliflozinn+oe-NC	-8.4	0.9609	0.814
		HFpEF+Dapagliflozinn+oe-AIM2	-13	0.8208	0.1185
9D	E/E'	HFpEF	38.6	0.9524	0.754	105.70, 3, 16	<0.0001	HFpEF vs. HFpEF+Dapagliflozin	8.76	0.9999	<0.0001	n = 5
		HFpEF+Dapagliflozin	22.8	0.9556	0.7773			HFpEF+Dapagliflozinn+oe-NC vs. HFpEF+Dapagliflozinn+oe-AIM2	5.11	0.9999	<0.0001
		HFpEF+Dapagliflozinn+oe-NC	21.8	0.9556	0.7773
		HFpEF+Dapagliflozinn+oe-AIM2	29.8	0.9137	0.4899
9E	HW/TL	HFpEF	10.12	0.9103	0.4692	98.04, 3, 16	<0.0001	HFpEF vs. HFpEF+Dapagliflozin	9.78	0.9999	<0.0001	n = 5
		HFpEF+Dapagliflozin	8.328	0.902	0.4209			HFpEF+Dapagliflozinn+oe-NC vs. HFpEF+Dapagliflozinn+oe-AIM2	4.3	0.9999	<0.0001
		HFpEF+Dapagliflozinn+oe-NC	8.543	0.8495	0.1928
		HFpEF+Dapagliflozinn+oe-AIM2	9.341	0.9228	0.5484
9F	Running distance	HFpEF	262	0.9074	0.4519	49.39, 3, 16	<0.0001	HFpEF vs. HFpEF+Dapagliflozin	5.57	0.9999	<0.0001	n = 5
		HFpEF+Dapagliflozin	291.8	0.943	0.6871			HFpEF+Dapagliflozinn+oe-NC vs. HFpEF+Dapagliflozinn+oe-AIM2	4.62	0.9999	0.0008
		HFpEF+Dapagliflozinn+oe-NC	287.4	0.8074	0.093
		HFpEF+Dapagliflozinn+oe-AIM2	274	0.836	0.1542
